# Supplementary material for: Removal of Pb(ii) from aqueous solution by mesoporous silica MCM-41 modified by ZnCl2: kinetics, thermodynamics, and isotherms
Source: Royal Society of Chemistry journal article supplement (doi:10.1039/c5ra01192b), 2015-01-01
Supplement: c5ra01192b1.pdf [file c5ra01192b1.pdf]

## The calculation method for SNE

- (1) Select one isotherm and one error function (for example, the *ERRSQ* error function) and get the *solver add-in* output to determine the isotherm parameters in a way that minimizes the applied error function (in this case, *ERRSQ*). (If the applied error function is the coefficient of determination, the *solver add-in* must be adjusted on maximizing.)
- (2) Determine the values of other error functions based on isotherm parameters obtained from step (1).
- (3) Perform the above steps exactly for all other error functions.
- (4) Select the maximum output of each error function from all sets. In order to calculate the normalized error, the value of other sets should be divided into the maximum value. This should be done for all error functions.
- (5) Calculate the summation of all of these normalized errors for each parameter.

**Table S1:** Lists of error functions

| Error function                         | Abbreviation | Definition/expression                                                                                                            |
|----------------------------------------|--------------|----------------------------------------------------------------------------------------------------------------------------------|
| The coefficient of determination       | $R^2$        | $R^2 = \frac{\sum (q_{e,meas} - \bar{q}_{e,calc})^2}{\sum (q_{e,meas} - \bar{q}_{e,calc})^2 + \sum (q_{e,meas} - q_{e,calc})^2}$ |
| Nonlinear chi-square test              | $\chi^2$     | $\chi^2 = \sum_{i=1}^n \frac{(q_{e,meas} - q_{e,calc})^2}{q_{e,meas}}$                                                           |
| Residual root mean square error        | $RMSE$       | $RMSE = \sqrt{\frac{1}{n-2} \sum_{i=1}^n (q_{e,meas} - q_{e,calc})^2}$                                                           |
| Average relative error                 | $ARE$        | $ARE = \frac{100}{n} \sum_{i=1}^n \left  \frac{q_{e,meas} - q_{e,calc}}{q_{e,meas}} \right $                                     |
| Standard deviation of relative errors  | $S_{RE}$     | $S_{RE} = \sqrt{\frac{\sum_{i=1}^n [(q_{e,meas} - q_{e,calc}) - ARE]^2}{n-1}}$                                                   |
| Marquardt's percent standard deviation | $MPSD$       | $MPSD = 100 \sqrt{\frac{1}{n-p} \sum_{i=1}^n \left( \frac{q_{e,meas} - q_{e,calc}}{q_{e,meas}} \right)^2}$                       |
| Sum squares errors                     | $ERRSQ$      | $ERRSQ = \sum_{i=1}^n (q_{e,meas} - q_{e,calc})^2$                                                                               |

$q_{meas}$ : Measured ion concentration;  $q_{calc}$ : calculated ion concentration with models;  $n$ : the number of experimental data points;  $p$ : the number of parameters in each isotherm model.

**Table S2.** Mathematical equations of the single-component isotherm models employed <sup>33</sup>

| <b>Isotherm</b>         | <b>Non-linear equation</b>              | <b>Linear equation</b>                                        |
|-------------------------|-----------------------------------------|---------------------------------------------------------------|
| <b>Freundlich</b>       | $q_e = K_f C_e^{1/n}$                   | $\ln(q_e) = \ln(K_f) + \frac{1}{n} \ln(C_e)$                  |
| <b>Langmuir</b>         | $q_e = \frac{q_m K_a C_e}{1 + K_a C_e}$ | $\frac{C_e}{q_e} = \frac{1}{q_m} C_e + \frac{1}{K_a q_m}$     |
| <b>Redlich–Peterson</b> | $q_e = \frac{A C_e}{1 + B C_e^m}$       | $\ln\left(A \frac{C_e}{q_e} - 1\right) = m \ln(C_e) + \ln(B)$ |

<sup>a</sup>  $K_f$ : Freundlich isotherm constant [(mg/g)(L/mg)<sup>1/n</sup>]; <sup>b</sup>  $n$ : Freundlich exponent (dimensionless)  
<sup>c</sup>  $q_m$ : Langmuir monolayer adsorption capacity (mg/g); <sup>d</sup>  $K_a$ : Langmuir isotherm constant (L/mg)  
<sup>e</sup>  $A$ : Redlich–Peterson isotherm constant (L/g); <sup>f</sup>  $B$ : Redlich Peterson isotherm constant (L/mg)<sup>1/m</sup>  
<sup>g</sup>  $m$ : Redlich-Peterson constant.

**Table S3.** The isotherm parameters and error deviation data for the adsorption of Pb(II) onto ZnCl<sub>2</sub>-MCM-41 obtained by non-linear regression method (T=20 °C, pH=7, sorbent dosage=0.333 g L<sup>-1</sup>, 60 min, 300 rpm)

| Freundlich (two parameter isotherm) |             |           |          |          |          |          |          |
|-------------------------------------|-------------|-----------|----------|----------|----------|----------|----------|
|                                     | $R^2$       | $\chi^2$  | $RMSE$   | $ARE$    | $S_{RE}$ | $MPSD$   | $ERRSQ$  |
| $K_f$                               | 56.7        | 55.6      | 56.4     | 42.6     | 50.4     | 43.4     | 56.5     |
| $1/n$                               | 0.576       | 0.626     | 0.577    | 0.663    | 0.624    | 0.697    | 0.577    |
| $R^2$                               | 0.991313    | 0.986864  | 0.991313 | 0.980046 | 0.985037 | 0.961906 | 0.991313 |
| $\chi^2$                            | 22.45112448 | 11.8379   | 15.8801  | 18.6419  | 15.1521  | 19.2883  | 15.72590 |
| $RMSE$                              | 23.1949     | 28.5768   | 23.1913  | 35.4180  | 30.5727  | 49.2948  | 23.1913  |
| $ARE$                               | 22.5491     | 16.0817   | 22.3045  | 10.7155  | 14.6455  | 10.9127  | 22.3049  |
| $S_{RE}$                            | 35.8897     | 31.3583   | 35.4203  | 27.3824  | 24.2253  | 45.0168  | 35.4207  |
| $MPSD$                              | 43.3860     | 26.1996   | 42.9553  | 17.2372  | 23.3644  | 15.4520  | 42.9560  |
| $ERRSQ$                             | 1614.01     | 2449.9083 | 1613.51  | 3763.33  | 2804.05  | 7289.94  | 1613.51  |
| $SNE$                               | 5.4891      | 4.4522    | 5.1965   | 4.5344   | 4.3995   | 5.66957  | 5.15833  |
| Langmuir (two parameter isotherm)   |             |           |          |          |          |          |          |
|                                     | $R^2$       | $\chi^2$  | $RMSE$   | $ARE$    | $S_{RE}$ | $MPSD$   | $ERRSQ$  |
| $q_m$                               | 506.5       | 479.1     | 506.6    | 440.4    | 516.5    | 426.8    | 506.6    |
| $K_a$                               | 0.142       | 0.155     | 0.142    | 0.171    | 0.130    | 0.176    | 0.142    |
| $R^2$                               | 0.999494    | 0.999027  | 0.999494 | 0.996972 | 0.997694 | 0.995741 | 0.999494 |
| $\chi^2$                            | 1.4282      | 1.0645    | 1.4307   | 1.7224   | 4.1567   | 2.1284   | 1.4307   |

|                       |         |        |         |          |          |          |         |
|-----------------------|---------|--------|---------|----------|----------|----------|---------|
| <i>RMSE</i>           | 5.5688  | 7.7290 | 5.5688  | 13.6498  | 11.9210  | 16.1978  | 5.5688  |
| <i>ARE</i>            | 5.9452  | 4.5185 | 5.9513  | 4.1043   | 10.0124  | 4.3710   | 5.9513  |
| <i>S<sub>RE</sub></i> | 6.3097  | 8.4609 | 6.2984  | 12.7020  | 2.4732   | 14.5385  | 6.2984  |
| <i>MPSD</i>           | 10.9172 | 7.9592 | 10.9271 | 6.3112   | 16.3789  | 6.2407   | 10.9271 |
| <i>ERRSQ</i>          | 93.0358 | 9.7480 | 93.0346 | 558.9575 | 426.3332 | 787.1149 | 93.0346 |
| <i>SNE</i>            | 3.4999  | 3.2643 | 3.5009  | 4.6336   | 5.4459   | 5.3258   | 3.5009  |

---

Redlich-Peterson (three parameter isotherm)

---

|                       | $R^2$    | $\chi^2$ | <i>RMSE</i> | <i>ARE</i> | <i>S<sub>RE</sub></i> | <i>MPSD</i> | <i>ERRSQ</i> |
|-----------------------|----------|----------|-------------|------------|-----------------------|-------------|--------------|
| <i>A</i>              | 75.84    | 79.93    | 75.84       | 75.83      | 68.30                 | 84.76       | 75.84        |
| <i>B</i>              | 0.2802   | 0.3098   | 0.2802      | 0.2802     | 0.2452                | 0.3546      | 0.2802       |
| <i>m</i>              | 0.837    | 0.815    | 0.837       | 0.837      | 0.861                 | 0.780       | 0.837        |
| $R^2$                 | 0.999981 | 0.999969 | 0.999981    | 0.999981   | 0.999776              | 0.999855    | 0.999981     |
| $\chi^2$              | 0.0962   | 0.0744   | 0.0962      | 0.0962     | 0.4571                | 0.1245      | 0.0962       |
| <i>RMSE</i>           | 1.0575   | 1.3712   | 1.0575      | 1.0579     | 3.7023                | 2.9823      | 1.0575       |
| <i>ARE</i>            | 1.3131   | 1.3598   | 1.3130      | 1.3117     | 3.3594                | 1.3884      | 1.3130       |
| <i>S<sub>RE</sub></i> | 1.5299   | 1.9357   | 1.5293      | 1.5152     | 0.8018                | 3.0014      | 1.5293       |
| <i>MPSD</i>           | 3.9737   | 2.9856   | 3.9740      | 3.9752     | 7.5103                | 2.5850      | 3.9740       |

**Table S4**

Comparison of monolayer maximum adsorption capacities ( $q_{max}$ ) of some adsorbents for Pb(II) removal from aqueous solution

| Sorbent                                                                      | Initial concentration<br>(mg/L) | Amount of adsorbent<br>(g/L) | Adsorption capacity<br>(mg/g) |
|------------------------------------------------------------------------------|---------------------------------|------------------------------|-------------------------------|
| Polyvinyltetrazole-grafted resin <sup>1</sup>                                | 103-1656                        | 1.0                          | 314.9                         |
| Acrylonitrile–Butadiene–Styrene <sup>2</sup>                                 | 20-300                          | 4.0                          | 56.5                          |
| Nanostructured BiOBr <sup>3</sup>                                            | 2-40                            | 0.5                          | 6.5                           |
| Thiol grafted on silica gel <sup>4</sup>                                     | 207-1656                        | 2.5                          | 497.1                         |
| Fe <sub>3</sub> O <sub>4</sub> nanocapsules <sup>5</sup>                     | 0.1-50                          | 0.5                          | 79.0                          |
| Amine grafted mesoporous silica<br>embedded with nano-magnetite <sup>6</sup> | 10-20                           | 0.667                        | 222.4                         |
| Amino siloxane oligomer-linked graphene<br>oxide <sup>7</sup>                | 10-400                          | 1.0                          | 312.5                         |
| ZnCl <sub>2</sub> -MCM-41 (this work)                                        | 2-200                           | 0.33                         | 479.0                         |

1. Y. Chen, M. He, C. Wang and Y. Wei, *Journal of Materials Chemistry A*, 2014, **2**, 10444-10453.
2. A. Masoumi, K. Hemmati and M. Ghaemy, *RSC Advances*, 2015, **5**, 1735-1744.
3. X. Wang, W. Liu, J. Tian, Z. Zhao, P. Hao, X. Kang, Y. Sang and H. Liu, *Journal of Materials Chemistry A*, 2014, **2**, 2599-2608.
4. L. N. Arakaki, V. L. A. Filha, J. G. Espinola, M. G. da Fonseca, S. F. de Oliveira, T. Arakaki and C. Airoidi, *Journal of Environmental Monitoring*, 2003, **5**, 366-370.
5. K. Cheng, Y.-M. Zhou, Z.-Y. Sun, H.-B. Hu, H. Zhong, X.-K. Kong and Q.-W. Chen, *Dalton Trans.*, 2012, **41**, 5854-5861.
6. J. Chung, J. Chun, J. Lee, S. H. Lee, Y. J. Lee and S. W. Hong, *Journal of hazardous materials*, 2012, **239**, 183-191.
7. S. Luo, X. Xu, G. Zhou, C. Liu, Y. Tang and Y. Liu, *Journal of hazardous materials*, 2014, **274**, 145-155.

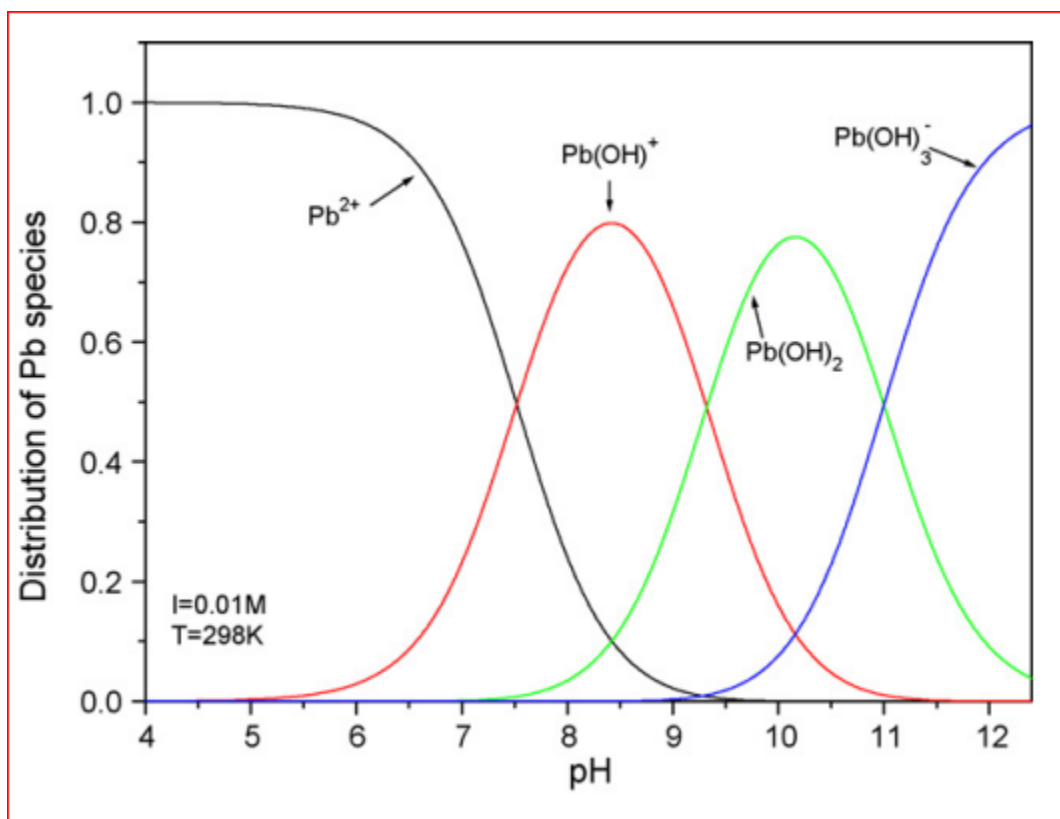

Fig. S1. Distribution of Pb(II) species as a function of pH.

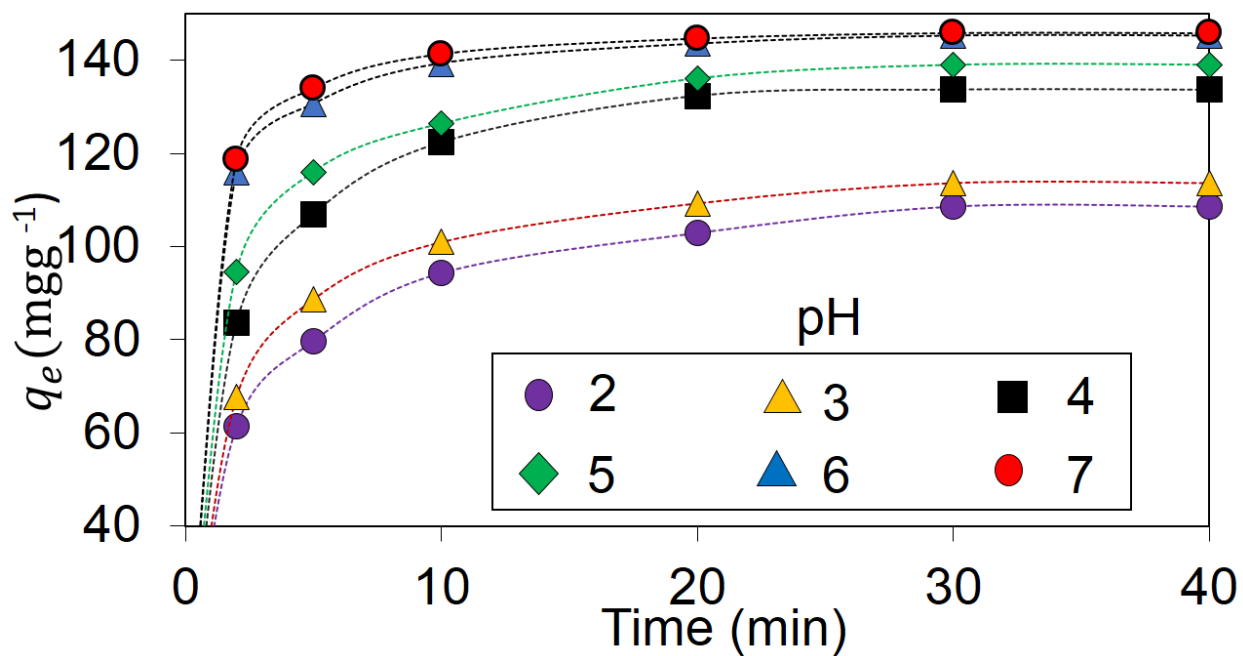

Fig. S2. The effect of pH on the adsorption of  $\text{Pb(II)}$  ions on  $\text{ZnCl}_2\text{-MCM-41}$  at ( $C_0=50$   $\text{mgL}^{-1}$ ;  $T=20$   $^\circ\text{C}$ ; Sorbent dosage= $0.333$   $\text{gL}^{-1}$ ; 300 rpm)



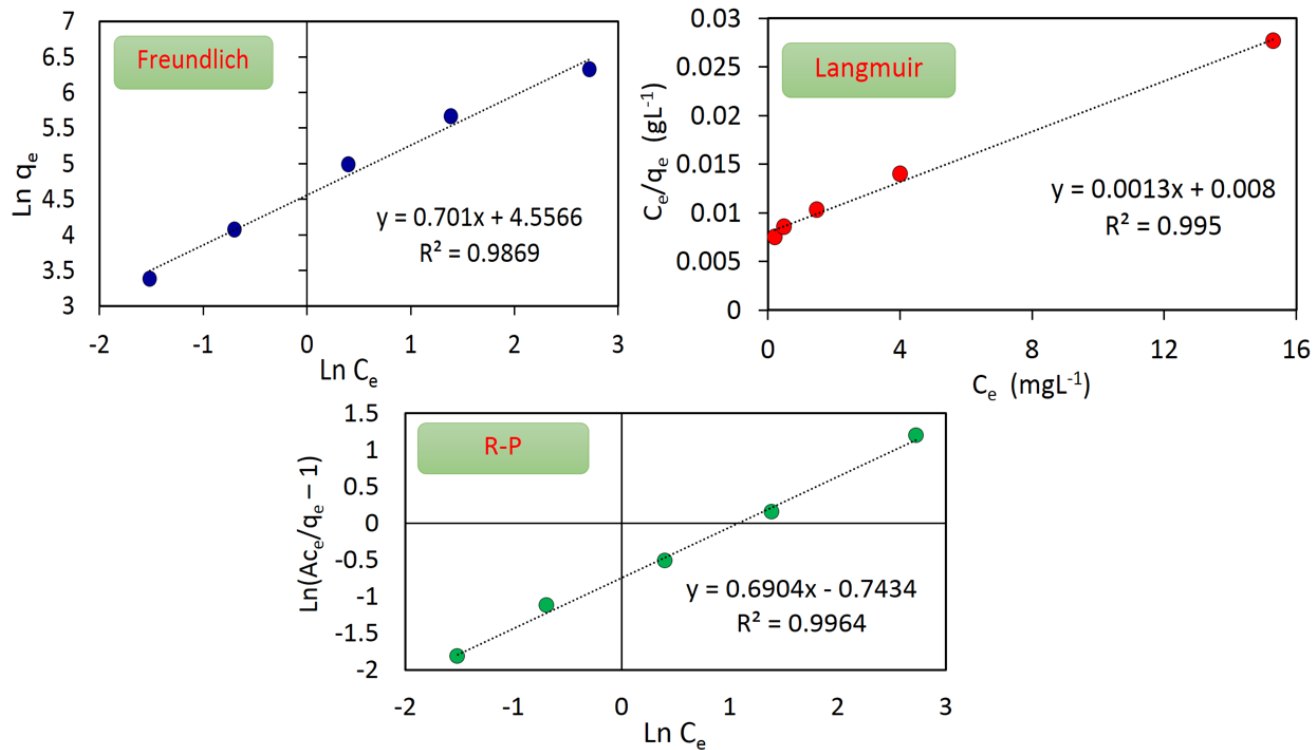

Fig. S3. Adsorption isotherms of Pb(II) removal by ZnCl<sub>2</sub>-MCM-41
